# Supplementary material for: Multimechanistic Monoclonal Antibodies (MAbs) Targeting Staphylococcus aureus Alpha-Toxin and Clumping Factor A: Activity and Efficacy Comparisons of a MAb Combination and an Engineered Bispecific Antibody Approach
Source: PubMed Central journal article supplement (PMC5527613; doi:10.1128/aac.00629-17), 2017-07-25
Supplement: AAC.00629-17_zac008176417s1.pdf [file AAC.00629-17_zac008176417s1.pdf]

**Table S1** SAR114 coverage against 112 isolates representing 40 different sequence type (ST) in human plasma agglutination assay.

| Strain   | ST | CifA variant | SAR114 (µg/ml) | Strain  | ST | CifA variant | SAR114 (µg/ml) |
|----------|----|--------------|----------------|---------|----|--------------|----------------|
| 3048965  | 1  | CifA044      | 1.56           | 3048984 | 12 | CifA004      | 0.78           |
| 3049036  | 1  | CifA012      | 6.2            | 3048948 | 12 | CifA043      | 3.1            |
| 3049040  | 1  | CifA012      | 3.1            | 3049084 | 12 | CifA017      | 1.56           |
| 3049054  | 1  | CifA046      | 6.2            | 3049092 | 15 | CifA015      | 1.56           |
| 3049086  | 1  | CifA055      | 1.56           | 3049113 | 15 | CifA015      | 1.56           |
| 3049101  | 1  | CifA055      | 3.1            | 3049120 | 15 | CifA015      | 0.78           |
| NRS123   | 1  | CifA012      | 12.5           | 3049172 | 15 | CifA015      | 0.78           |
| ARC801   | NA | NA           | 3              | 3049178 | 15 | CifA015      | 1.5            |
| ARC4211  | 5  | CifA002      | 1.5            | 3048963 | 15 | CifA015      | 1.56           |
| NRS387   | 5  | CifA002      | 1.5            | 3049077 | 15 | CifA015      | 3.1            |
| ARC2378  | 5  | CifA002      | 3.12           | 3049090 | 22 | CifA022      | 1.56           |
| ARC2379  | 5  | CifA002      | 3.1            | 3049125 | 22 | CifA053      | 1.56           |
| ARC2380  | 5  | CifA002      | 1.56           | 3049126 | 22 | CifA053      | 1.56           |
| ARC634   | 5  | CifA002      | 1.56           | 3049127 | 22 | CifA022      | 3.1            |
| ARC635   | 5  | CifA002      | 0.7            | 3049129 | 22 | CifA022      | 1.56           |
| ARC795   | 5  | CifA002      | 6.25           | 3049046 | 26 | CifA005      | 0.78           |
| NRS382   | 5  | CifA002      | 3              | 3049089 | 30 | CifA018      | 0.78           |
| 3049005  | 5  | CifA002      | 3.1            | 3048989 | 30 | CifA004      | 1.56           |
| 3049139  | 7  | CifA018      | 1.56           | 3049088 | 30 | CifA004      | 0.78           |
| 3049166  | 7  | CifA018      | 3.1            | 3049093 | 30 | CifA004      | 1.56           |
| ARC796   | 8  | CifA001      | 1.5            | 3049096 | 30 | CifA004      | 0.78           |
| 3043406  | NF | CifA001      | 25             | 3049114 | 30 | CifA004      | 1.56           |
| 3043527  | 8  | CifA001      | 6              | 3049173 | 30 | CifA004      | 0.78           |
| 3043691  | NA | CifA001      | 6.25           | 3049174 | 30 | CifA004      | 1.56           |
| 3049057  | 8  | CifA001      | 6              | 3049176 | 30 | CifA004      | 1.56           |
| ARC2068  | 8  | CifA001      | 3.12           | 3049191 | 30 | CifA047      | 1.56           |
| ARC2402  | 8  | CifA001      | 3.12           | ARC2081 | 30 | CifA004      | 0.7            |
| ARC2403  | 8  | CifA001      | 6.25           | ARC629  | 30 | CifA004      | 1.56           |
| ARC2464  | 8  | CifA001      | 3.12           | UAMS-1  | 30 | CifA004      | 1.56           |
| ARC2465  | 8  | CifA001      | 3.12           | 3049095 | 34 | CifA004      | 0.78           |
| ARC517   | 8  | CifA001      | 3.12           | 3049118 | 45 | CifA009      | 0.78           |
| BAA-1556 | 8  | CifA001      | 6              | 3049119 | 45 | CifA009      | 0.78           |
| SF8300   | 8  | CifA001      | 1.5            | 3049122 | 45 | CifA009      | 1.56           |
| NRS384   | 8  | CifA001      | 1.56           | 3049135 | 45 | CifA056      | 1.56           |
| ARC2490  | 8  | CifA001      | 3.12           | 3049141 | 45 | CifA009      | 12.5           |
| ARC2491  | 8  | CifA001      | 3.12           | NRS22   | 45 | CifA009      | 1.5            |
| ARC2558  | 8  | CifA001      | 3.12           | 3049048 | 45 | CifA009      | 3              |
| NRS385   | 8  | CifA001      | 6.25           | 3049112 | 45 | CifA009      | 1.5            |
| Newman   | 8  | CifA001      | 1.5            | 3049064 | 45 | CifA009      | 0.78           |

| <b>Strain</b> | <b>ST</b> | <b>ClfA variant</b> | <b>SAR114 (µg/ml)</b> |
|---------------|-----------|---------------------|-----------------------|
| 3049048       | 45        | NT                  | 1.56                  |
| 3048969       | 59        | ClfA014             | 1.56                  |
| ARC2566       | 72        | ClfA049             | 3.12                  |
| 3049091       | 72        | ClfA016             | 1.56                  |
| 3049042       | 87        | ClfA014             | 3.1                   |
| ARC2408       | 87        | ClfA014             | 0.78                  |
| 3049032       | 88        | ClfA007             | 3.1                   |
| 3049167       | 96        | ClfA045             | 0.78                  |
| 3048966       | 97        | ClfA001             | 1.56                  |
| 3049033       | 97        | ClfA001             | 0.78                  |
| 3049137       | 97        | ClfA001             | 1.56                  |
| 3049134       | 101       | ClfA029             | 0.78                  |
| 3049138       | 106       | ClfA029             | 3.1                   |
| 3049103       | 121       | ClfA008             | 0.78                  |
| 3049181       | 121       | ClfA052             | 1.56                  |
| ARC2784       | 188       | ClfA019             | 3                     |
| 3049179       | 188       | ClfA019             | 3.1                   |
| 3049047       | 188       | ClfA019             | 6.2                   |
| 3049162       | 188       | ClfA058             | 5                     |
| ARC797        | 225       | ClfA002             | 6                     |
| 3049152       | 239       | ClfA003             | 3.1                   |
| NRS383        | 346       | ClfA004             | 6                     |
| 3048952       | 398       | ClfA048             | 0.78                  |
| 3049196       | 764       | ClfA002             | 0.78                  |
| 3049177       | 769       | ClfA012             | 0.78                  |
| ARC516        | 890       | ClfA054             | 1.56                  |
| 3049104       | 1210      | ClfA042             | 1.56                  |
| Wright        | 508       | ClfA009             | 3.1                   |
| Lowenstein    | 25        | ClfA005             | 3.1                   |
| 3049109       | 582       | ClfA013             | 3.1                   |
| 3049115       | NF        | ClfA015             | 0.78                  |
| 3049182       | NF        | ClfA050             | 1.56                  |
| 3049163       | NF        | ClfA058             | 5                     |
| 3049168       | NF        | ClfA058             | 12.5                  |

Each isolate was grown overnight, and incubated for 3 min at 37°C with serial dilution of anti-ClfA mAb SAR114 (50 to 0.7 µg/ml), and human sera. Minimum concentration of SAR114 (µg/ml) resulting in agglutination inhibition was recorded. For each isolate, no inhibition for c-IgG>100 µg/ml. In some case, strains were non typeable (NT) as indicated. Whole genome sequence was not performed on some strains, therefore ST and ClfA variant sequence were unknown (NA).

**Table S2** In vitro activities as measured in IC<sub>50</sub> (μM) of SAR114- and 11H10-Bis molecules in fibrinogen binding inhibition and rabbit RBC hemolytic assays

|                    | Fibrinogen binding <sup>a</sup> |         |         |         |                           |         | RBC hemolysis <sup>b</sup> |                         |
|--------------------|---------------------------------|---------|---------|---------|---------------------------|---------|----------------------------|-------------------------|
|                    | ClfA001                         | ClfA002 | ClfA004 | ClfA001 | +AT<br>(6.6mM)<br>ClfA002 | ClfA004 | AT                         | +ClfA001<br>(1mM)<br>AT |
| <b>11H10</b>       | 24.59                           | 997.5   | 23.94   | 18.34   | 1239                      | 32.7    |                            |                         |
| <b>11H10-BiS2</b>  | 29.01                           | 1515    | 22.26   | 36.25   | 1324                      | 32.15   | 0.138                      | 0.146                   |
| <b>11H10-BiS3</b>  | 24.86                           | 761.2   | 18.65   | 44.18   | 979.4                     | 37.5    | 0.138                      | 0.149                   |
| <b>SAR114</b>      | 16.09                           | 6.004   | 13.61   | 12.49   | 6.37                      | 20.64   |                            |                         |
| <b>SAR114-BiS2</b> | 25.7                            | 38.7    | 21.86   | 28.37   | 25.64                     | 19.61   | 0.09                       | 0.157                   |
| <b>SAR114-BiS3</b> | 36.35                           | 23.4    | 29.85   | 26.96   | 22.8                      | 28.11   | 1.052                      | 1.126                   |
| <b>MEDI4893*</b>   |                                 |         |         |         |                           |         | 0.1                        | 0.02                    |

Comparison of vitro activities of 11H10- or SAR114-BiS molecules with parental mAbs 11H10 and SAR144 was measured in the fibrinogen binding assay<sup>a</sup> to the three main ClfA genotypes alone (666μM) or in 10M excess of AT (6.6 mM), and with MEDI4893\* in the rabbit RBC hemolytic assay<sup>b</sup> with AT alone (0.1 μM) or in presence of 10M excess of ClfA001 (1 μM). IC<sub>50</sub> (μM) was calculated as the Ab concentration resulting in 50% inhibition in each assay.

**Fig. S1**

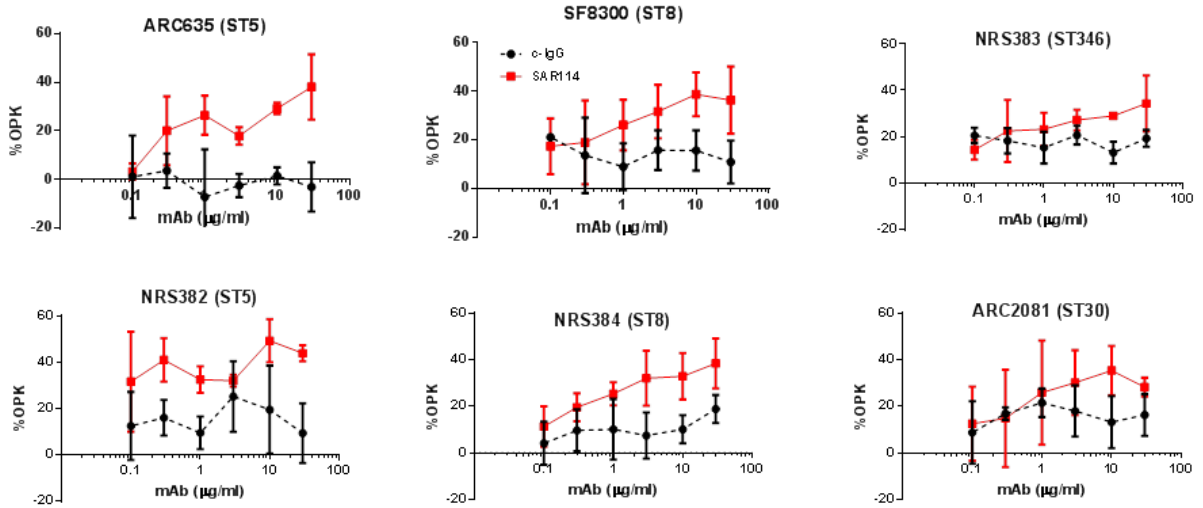

**Fig.S1: Opsonophagocytic killing activity of anti-ClfA mAb SAR114 against different isolates.** *S. aureus* strains were incubated with human HL-60 cells, human sera, and serial dilutions of SAR114 (■) or c-IgG (●). Graph represents mean values  $\pm$  SD of three independent experiments.

**Fig. S2**

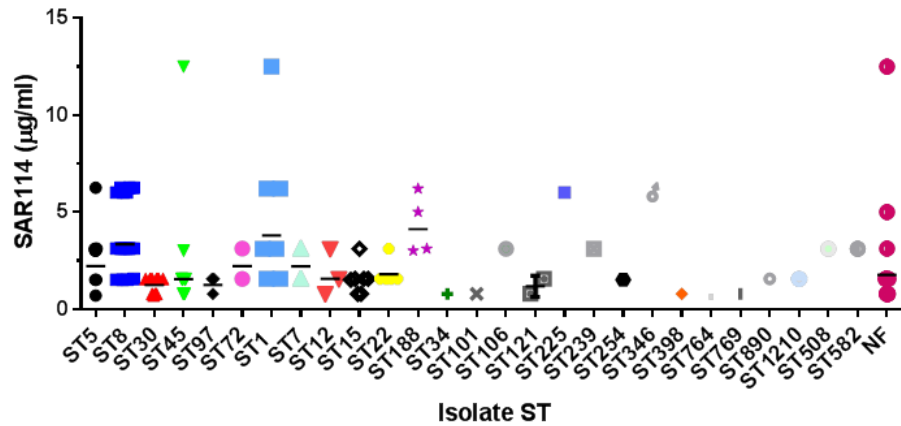

**Figure S2: Anti-ClfA mAb SAR114 inhibits agglutination of multiple sequence type strains.** One hundred and twelve *S. aureus* clinical isolates representing 40 different sequence types (ST) and some not found (NF) were cultured overnight in TSB, washed in PBS and suspended to one tenth of the original volume in ice-cold PBS. Anti-ClfA mAb SAR114 was two-fold serially diluted starting at 200 µg/ml and mixed with 30 µl of citrated human plasma in a 96-well U bottom plate (Thermo Fisher Scientific). Bacteria were added (30 µl) and incubated 5 min at 37°C. Each well was evaluated visually and the lowest mAb concentration where bacteria agglutinated was recorded. R347, a human anti-gp120 mAb was utilized as an isotype control human IgG1 (c-IgG).

**Fig. S3**

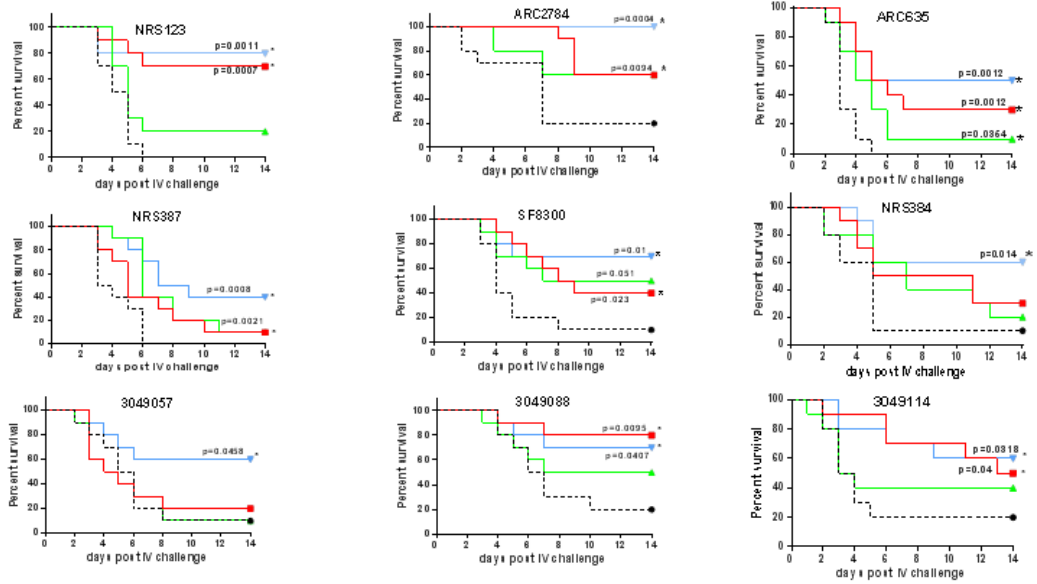

**Fig. S3: SAR114+MEDI4893\* provides strain coverage in IV lethal bacteremia.** Balb/c mice were immunized with 15mpk of SAR114 (■), MEDI4893\* (▲) or a combination of each at 7.5mpk (▼), and IV infected 24h later with different *S. aureus* clinical isolates from diverse sequence types (ST), and CifA genotypes: NRS123 (ST1, CifA012), NRS387 (ST5, CifA002), ARC635 (ST5, CifA002), 3049043 (ST5, CifA002), 3049057 (ST8, CifA001), SF8300 (ST8, Cif A001), 3049088 (ST30, CifA004), 3049114 (ST30, CifA004) and ARC2784 (ST188, CifA019). Irrelevant c-IgG (●) was injected at 15mpk. Survival was monitored for 2 weeks. Results were analyzed with a Log Rank (Mantel Cox) test. Statistical analysis versus c-IgG were considered statistically different if  $p < 0.05$ , and indicated with an asterisk (\*). Data are representative of three independent experiments.

Fig. S4

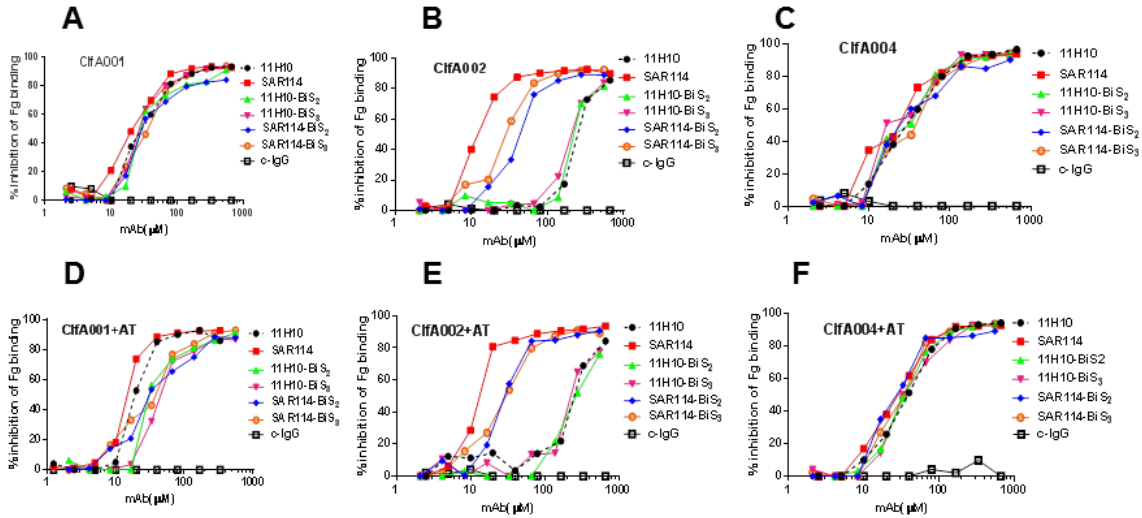

Fig. S4: ClfA mAb and BiSAb activity in fibrinogen inhibition assay. Inhibition of fibrinogen binding to the three main ClfA genotypes was measured in presence of serial dilutions of 11H10, SAR114 or respective BiSAbs (A, B, C). Similar assay conducted when AT scFv was saturated in presence of 10M excess of AT (6.6mM) (D, E, F). Graphs are representative of one of three separate experiments.

**Fig. S5**

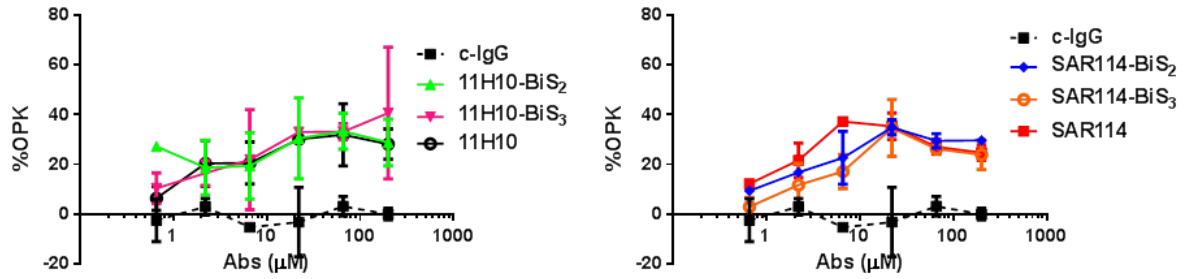

**Figure S5: Opsonophagocytic killing (OPK) activity of anti-CifA/AT BiS molecules.** *S. aureus* Newman isolate was incubated with human HL-60 cells, human sera, and serial dilutions of SAR114 or 11H10-BiS molecules, SAR114 and 11H10 parental mAbs or negative control-IgG (■). Graph represents mean values ± SD of two independent experiments.
